# Supplementary material for: Implications of AlphaFold2 for crystallographic phasing by molecular replacement
Source: PubMed Central journal article supplement (PMC8725160; doi:10.1107/s2059798321012122), 2022-01-01
Supplement: d-78-00001-sup1.pdf [file d-78-00001-sup1.pdf]

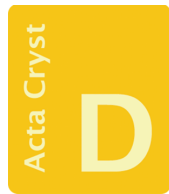

STRUCTURAL  
BIOLOGY

**Volume 78 (2022)**

**Supporting information for article:**

**Implications of *AlphaFold2* for crystallographic phasing by  
molecular replacement**

**Airlie J. McCoy, Massimo D. Sammito and Randy J. Read**

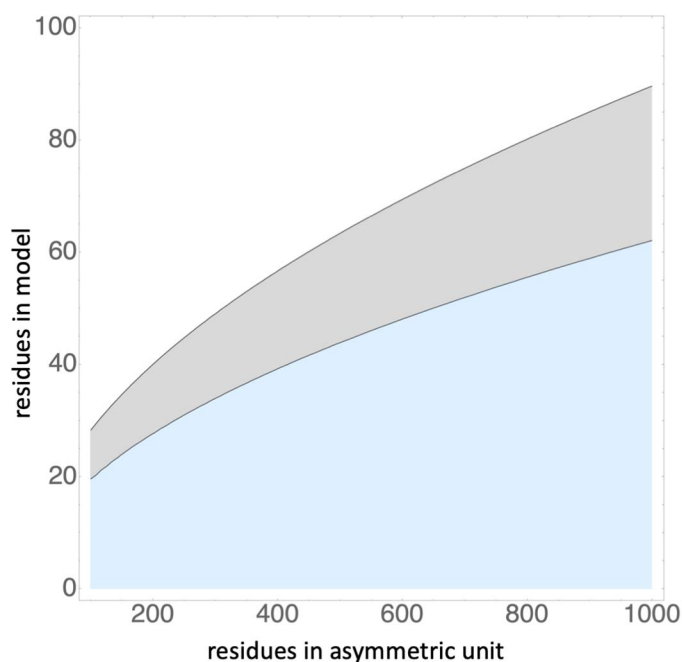

**Figure S1** Expected LLG for an accurate model (0.4 Å RMS) given data to 2.2 Å resolution. The eLLG is shown as a function of asymmetric unit content (measured in amino acid residues) and the size of the model (also in residues). In computing the number of reflections expected, a solvent content of 50% was assumed. The lower contour bordering the blue area represents an eLLG of 60 and the higher contour bordering the grey area an eLLG of 125. LLG values above 60 generally indicate success when placing a first component, whereas the value of 125 is the default target eLLG used by Phaser to make strategic choices about resolution and model size. This plot indicates, for instance, that attempts to place an accurate model comprising as little as 25-40 residues should be successful when the asymmetric unit contains 200 residues, whereas a model comprising 50-80 residues would be needed for an asymmetric unit of 800 residues.

**Table S1** Crystallographic targets of interest showing organism of origin and prediction classification.

Free modelling (FM), template-based modelling (TBM) and borderline between free modelling and template-based modelling (FM/TBM).

| Crystal | Organism                                             | Target   | Category |
|---------|------------------------------------------------------|----------|----------|
| 1 6t1z  | Lactococcus cremoris                                 | T1024    | TBM-easy |
| 2 6poo  | <b>Streptococcus agalactiae</b>                      | T1030    | MultiDom |
|         |                                                      | T1030-D1 | TBM-hard |
|         |                                                      | T1030-D2 | TBM-hard |
| 3 6vr4  | <i>Cellulophaga baltica</i> crAss-like phage phi14:2 | T1031    | FM       |
|         |                                                      | T1033    | FM       |
|         |                                                      | T1035    | FM/TBM   |
|         |                                                      | T1037    | FM       |
|         |                                                      | T1039    | FM       |
|         |                                                      | T1040    | FM       |
|         |                                                      | T1041    | FM       |
|         |                                                      | T1042    | FM       |
|         |                                                      | T1043    | FM       |
| 4 6n64  | Mus musculus (SMCHD1)                                | T1032    | TBM-hard |
| 5 6tmm  | <b>Tetrahymena thermophila</b>                       | T1034    | TBM-easy |
| 6 6ya2  | Tomato spotted wilt tospovirus                       | T1038    | Multidom |
|         |                                                      | T1038-D1 | FM       |
|         |                                                      | T1038-D2 | FM/TBM   |
| 7 6px4  | <b>Escherichia phage ECML-134</b>                    | T1046s1  | TBM-hard |
|         |                                                      | T1046s2  |          |
| 9 6y4f  | Proteus mirabilis                                    | T1049    | FM       |
| 10      | Bacteroides Ovatus                                   | T1050    | TBM-easy |
| 11      | Salmonella enterica                                  | T1052    | TBM-easy |
| 12      | Legionella pneumophila                               | T1053    | FM/TBM   |
| 13      | Acinetobacter baumannii                              | T1054    | TBM-hard |
| 14      | Staphylococcal phage                                 | T1056    | TBM-hard |
| 15      | Pseudomonas aeruginosa                               | T1058    | FM/TBM   |
| 16 7jtl | SARS-CoV2                                            | T1064    | FM       |
| 17      | Serratia marcescens                                  | T1065s1  | FM/TBM   |
|         |                                                      | T1065s2  |          |
| 18      | Bdellovibrio bacteriovorus                           | T1067    | TBM-hard |
| 19      | Escherichia virus CBA120                             | T1070    | FM       |
|         |                                                      | T1070-D1 | TBM-easy |
|         |                                                      | T1070-D2 | TBM-hard |
|         |                                                      | T1070-D3 | TBM-easy |
|         |                                                      | T1074-T4 |          |
| 20      | Bdellovibrio bacteriovorus                           | T1073    | TBM-easy |
| 21      | Bdellovibrio bacteriovorus                           | T1074    | FM       |
| 22      | Bdellovibrio bacteriovorus                           | T1079    | TBM-hard |
| 23      | Bdellovibrio bacteriovorus                           | T1080    | FM/TBM   |
| 24 6x6o | T4 phage                                             | T1082    | FM/TBM   |
| 25      | Nitrosococcus oceani                                 | T1083    | TBM-hard |
| 26      | Meiothermus silvanus                                 | T1084    | TBM-hard |
| 27      | Bdellovibrio bacteriovorus                           | T1085    | Multidom |
|         |                                                      | T1085-D1 | TBM-hard |
|         |                                                      | T1085-D2 | FM/TBM   |
|         |                                                      | T1085-D3 | TBM-hard |
| 28      | Bdellovibrio bacteriovorus                           | T1086    | Multidom |
|         |                                                      | T1086-D1 | TBM-easy |
|         |                                                      | T1086-D2 | TBM-hard |
| 29      | Methylobacter tundripaludum                          | T1087    | TBM-hard |
| 30      | Bacteroides finegoldii                               | T1089    | TBM-easy |
| 31 7k7w | Schizosaccharomyces pombe                            | T1090    | FM       |
| 32      | Streptococcus oralis                                 | T1091    | TBM-easy |
| 33      | Archaeoglobus fulgidus                               | T1100    | TBM-hard |
| 34      | Bilateria                                            | T1101    | Multidom |
|         |                                                      | T1101-D1 | TBM-easy |
|         |                                                      | T1101-D2 | TBM-easy |

**Table S2** Crystals phased by isomorphous replacement, that were reported to the PDB, contained protein and had both a deposition date and release date in 2020.

PDB phasing method as recorded in the 'structure determination method' field.

|    | PDBID | resolution | PDB Phasing Method | Publication Phasing Method | Details                   | Publication                         |
|----|-------|------------|--------------------|----------------------------|---------------------------|-------------------------------------|
| 1  | 6TUG  | 2.4        | SIRAS              | SIRAS                      | native + Hg               | (Garcia-Doval <i>et al.</i> , 2020) |
| 2  | 6VJI  | 2.5        | MIRAS              | MAD/MIRAS                  | Se-MAD + Pt + Au + native | (Eckenroth <i>et al.</i> , 2021)    |
| 3  | 6VW9  | 1.8        | SIRAS              | SIRAS                      | native + I                | (Zimanyi <i>et al.</i> , 2020)      |
| 4  | 6W8R  | 2.8        | MIRAS              | SIRAS                      | native + Se               | (Zhu <i>et al.</i> , 2020)          |
| 5  | 6WA6  | 2.8        | MIRAS              | MIRAS                      | Au + Pt + U + native      | (Jensen <i>et al.</i> , 2020)       |
| 6  | 6WHB  | 1.9        | SIRAS              | SIRAS                      | native + I                | (Filipčík <i>et al.</i> , 2020)     |
| 7  | 6WN2  | 1.8        | MIR                | MR                         |                           | (He <i>et al.</i> , 2020)           |
| 8  | 6Y7F  | 2.1        | SIRAS              | SIRAS                      | native + Hg               | (Nie <i>et al.</i> , 2021)          |
| 9  | 6Y9L  | 4.1        | MIRAS              | SAD                        | Os-SAD                    | (Bahat <i>et al.</i> , 2020)        |
| 10 | 6YV7  | 2.7        | SIRAS              | SIRAS                      | native + W                | (Gandini <i>et al.</i> , 2020)      |
| 11 | 6Z4E  | 2.0        | MIR                | MAD                        | Pt-MAD                    | (Micevski <i>et al.</i> , 2020)     |
| 12 | 7AED  | 1.8        | SIRAS              | SAD                        | Se-SAD                    | (Jäger <i>et al.</i> , 2020)        |
| 13 | 7BQI  | 1.3        | SIRAS              | SIRAS                      | native + Hg               | (Sakurai <i>et al.</i> , 2020)      |
